1 **Facilitation of neural responses to targets moving in three-dimensional optic**  
2 **flow**

3 *Sarah Nicholas<sup>1</sup> and Karin Nordström<sup>1,2\*</sup>*

4 <sup>1</sup>*Flinders Health and Medical Research Institute, Flinders University, GPO Box 2100, Adelaide,*  
5 *SA, 5001, Australia*

6 <sup>2</sup>*Department of Neuroscience, Uppsala University, Box 593, 751 24 Uppsala, Sweden*

7 \*email: [karin.nordstrom@flinders.edu.au](mailto:karin.nordstrom@flinders.edu.au)

8 **ORCIDs**

9 Sarah Nicholas: 0000-0002-5555-9421

10 Karin Nordström: 0000-0002-6020-6348

11 **Classification**

12 Biological sciences: Neuroscience

13 **Keywords**

14 Target motion, insect vision, motion vision, background motion, hoverfly, TSDN, wide-field  
15 motion, inhibition, facilitation

16

## 17 **Abstract**

18 For the human observer, it can be difficult to follow the motion of small objects, especially  
19 when they move against background clutter. However, insects efficiently do this, as  
20 evidenced by their ability to capture prey, pursue conspecifics, or defend territories, even in  
21 highly textured surrounds. This behavior has been attributed to optic lobe neurons that are  
22 sharply tuned to the motion of small targets, as these neurons respond robustly even to a  
23 target moving against background motion. However, the target selective descending  
24 neurons (TSDNs), that more directly control behavioral output, do not. Importantly, though,  
25 the backgrounds used previously not only lacked 3D motion cues, but also high-contrast  
26 features, both of which would be encountered during natural behaviors. To redress this  
27 deficiency, we here use backgrounds consisting of many targets moving coherently to  
28 simulate the type of 3D optic flow that would be generated by an insect's own motion  
29 through the world. We show that hoverfly TSDNs do not respond to this type of optic flow,  
30 even though it contains features with spatio-temporal profiles similar to optimal targets.  
31 However, TSDN responses are inhibited when this optic flow is shown together with a  
32 target. More surprisingly, TSDNs are facilitated by horizontal, frontal optic flow in the  
33 opposite direction to target motion. We show that these interactions are likely inherited  
34 from the pre-synaptic neurons, and argue that the facilitation could benefit the initiation of  
35 target pursuit.

36

## 37 **Significance statement**

38 Target detection in visual clutter is a difficult computational task that insects, with their  
39 poor resolution compound eyes and small brains, do successfully and with extremely short  
40 behavioral delays. We here show that target neurons do not respond to widefield motion  
41 consisting of a multitude of “targets”, suggesting that the hoverfly visual system interprets  
42 coherent widefield motion differently from the motion of individual targets. In addition, we  
43 show that widefield motion in the opposite direction to target motion increases the neural  
44 response. This is an incredibly non-intuitive finding, and difficult to reconcile with current  
45 models for target selectivity, but has behavioral relevance.

46

47 **/body**

## 48 **Introduction**

49 The survival of many animals often depends on their ability to visually detect small moving  
50 objects or targets, as these could represent predators, prey, mates or territorial intruders  
51 (1). Efficient target detection is a computationally challenging task, which becomes even  
52 more difficult when done against visual clutter. Despite this, many insects successfully  
53 detect targets, followed by highly acrobatic pursuits, often in visually complex  
54 environments. For example, male *Eristalis tenax* hoverflies establish territories in foliage rich  
55 areas, on alert for intruders and ready to engage in high-speed pursuit (2).

56 Initial target detection can be facilitated by behaviors that render the background  
57 stationary, thus making the target the only thing that moves. Many insects and vertebrates  
58 thus visualize targets against the bright sky (3), or from a stationary stance, such as perching  
59 (4-6) or hovering (7, 8). However, as soon as the pursuer moves, this creates self-generated  
60 optic flow (9), against which the independent motion of the target needs to be  
61 discriminated. That insects do this successfully is remarkable considering their small brains  
62 and low-resolution compound eyes (10), suggesting a high level of optimization.

63 Predatory dragonflies and territorial hoverflies, which both pursue targets, have sharply  
64 tuned small target motion detector (STMD) neurons in their optic lobes (11, 12).

65 Impressively, some STMDs respond robustly to targets in clutter, even without relative  
66 velocity differences (12, 13), suggesting that they could support behavioral pursuit against  
67 self-generated optic flow. However, the target selective descending neurons (TSDNs), which  
68 are thought to be post-synaptic to STMDs (14), do not respond to targets moving across syn-

69 directional background motion (15). This is peculiar as descending neurons more directly  
70 drive behavioral output (16, 17). Importantly, however, the backgrounds used in previous  
71 STMD (12, 13, 18) and TSDN (15) experiments consisted of panoramic images that were  
72 displaced across the visual monitor, lacking the 3D cues associated with real pursuits (19,  
73 20). In addition, even if some backgrounds had spatial statistics resembling natural images  
74 (21) they lacked the high-contrast edges often found in natural scenes. Where naturalistic  
75 backgrounds contained small, high-contrast features, these would often generate STMD  
76 responses (13). Indeed, it is highly likely that STMDs generate their ability to detect targets  
77 in clutter by being sharply tuned to the target's unique spatio-temporal profile (22).

78 To investigate TSDN responses to targets in background motion, under more dynamic  
79 conditions, we used an optic flow stimulus consisting of many "targets" simulated to move  
80 coherently around the fly's point of view (23). We use this to simulate the type of optic flow  
81 generated during translations and rotations through the world. Importantly, the individual  
82 components that make up the optic flow contain the same high-contrast edges as the target  
83 itself, against which target motion can only be determined by its independent trajectory.  
84 We quantified the responses of *Eristalis* TSDNs to targets moving against 6 types of optic  
85 flow (23), three translations and three rotations. We found that optic flow on its own did  
86 not generate any TSDN response, even when moving in the neuron's preferred direction,  
87 and despite it consisting of many "targets". Consistent with previous results (15), we found  
88 that optic flow in the same direction as the target inhibits the TSDN response. Importantly,  
89 inhibition occurred even if the optic flow only preceded target motion and did not appear  
90 concurrently. Most strikingly we showed that optic flow in the opposite direction to target

91 motion increased the TSDN response. This facilitation required opposing horizontal optic  
92 flow in the frontal visual field. Such neural facilitation is a novel observation.

## 93 **Results**

### 94 ***3D optic flow strongly affects the TSDN response to target motion***

95 We recorded extracellularly from target selective descending neurons (TSDNs) in male  
96 *Eristalis tenax* hoverflies. TSDNs respond strongly to the motion of a small, dark target (15,  
97 23), traversing a white background (Fig. 1A, B, Movie 1, 2, Fig. S1A-C). We used a 3D optic  
98 flow stimulus simulating the coherent motion of many “targets” (23) around the hoverfly’s  
99 position. Against this optic flow, representing retinal flow fields experienced during flight  
100 through the world, the target can only be identified by its independent trajectory. Indeed,  
101 when both are stationary, there are no features identifying the target (Fig. 1A). Despite this,  
102 TSDNs respond strongly to targets moving across stationary optic flow (Fig. 1B; Movie 3, 4;  
103 Fig. S1A-C).

104 For quantification, we calculated the mean spike frequency for the duration of target  
105 motion, after excluding the first and last 40 ms (dotted box, Fig. S1A-C). We found a small,  
106 significant response reduction to targets moving across stationary optic flow compared with  
107 a white background (Fig. 1B). As the response across neurons was variable (N=34,  
108 coefficient of variation 60% and 63%, respectively, Fig. 1B), we normalized the response  
109 from each neuron to its own mean response to a target moving across a white background.

110 We found that when the target moved horizontally across sideslip optic flow moving in the  
111 same direction, the TSDN response was strongly inhibited (Fig. 1C, D, “Sideslip +50”),

112 compared with control where the target moved over stationary optic flow (grey, Fig. 1C, D).  
113 Yaw optic flow in the same direction as the target also strongly inhibited the TSDN response  
114 (Fig. 1C, D, “Yaw +50”). This complete inhibition is striking (Movie 5, 6), but consistent with  
115 previous TSDN work using sliding background images (15).

116 In contrast, when the sideslip moved in the opposite direction to the target the TSDN  
117 response was strongly enhanced (Movie 7, 8, Fig. 1C, D, “Sideslip -50”, mean increase  
118 71.1%). Similarly, yaw optic flow in the opposite direction to the target also facilitated the  
119 TSDN response, by 84.9% (Fig. 1C, D, “Yaw -50”). Such response facilitation was not seen  
120 when displaying targets moving over panoramic background images, in either TSDNs (15) or  
121 other target tuned neurons in the fly optic lobes (12, 18, 24).

122 At any one time the optic flow itself contained ca. 1200 “targets” moving coherently on the  
123 display in front of the fly (23). When the sideslip moved in the TSDN’s preferred direction  
124 tens of these “optic flow targets” moved through the TSDN receptive field (Movie 5, 6).  
125 Despite this, preferred direction sideslip without target motion only generated a response in  
126 18% of 222 repetitions across 12 TSDNs (Fig. S1D, “Sideslip +50”). In addition, when  
127 preferred direction sideslip did generate a TSDN response, this was less than one-fifth of the  
128 response to a target traversing a white background (Fig. S1E, “Sideslip +50”). This suggests  
129 that the coherent motion of the “targets” in the optic flow is treated differently from the  
130 motion of a single target.

131 We next investigated the effect other types of 3D optic flow had on TSDN responses to  
132 target motion. We found that the target response was inhibited by lift (mean 44.0%  
133 response for downwards lift, “Lift +50”; mean 34.3% for upwards lift, “Lift -50”, Fig. S2).

134 When the target was displayed against pitch, which provides similar vertical motion in the  
135 frontal visual field, the response was suppressed to similar levels (57.1%, “Pitch +50”;  
136 54.9%, “Pitch -50”, Fig. S2). In addition, the target response was inhibited to roughly similar  
137 levels when displayed against thrust or roll optic flow in either direction (Fig. S2). No optic  
138 flow generated a substantial TSDN response when displayed on its own (Fig. S1D, E).

### 139 ***Inherited optic flow interactions***

140 Our data show that optic flow significantly affects the TSDN response to target motion (Fig.  
141 1, S2). Where does the optic flow pathway interact with the target motion pathway? If  
142 widefield sensitive neurons interact directly with the TSDNs, as previously suggested (15),  
143 the optic flow should act independently. That is, if the target changes direction but the optic  
144 flow remains the same, the influence the optic flow has on the TSDN response should  
145 remain similar. In contrast, if the interaction is inherited from pre-synaptic neurons, we  
146 expect the TSDN response to show significant interaction between target direction and optic  
147 flow direction.

148 We investigated this by recording from TSDNs that respond robustly both to horizontal  
149 (grey, Fig. S3) and vertical target motion (black, Fig. S3), displayed against either sideslip or  
150 lift (Fig. 2). As above (Fig. 1, S2), the TSDN response was inhibited when a horizontally  
151 moving target was displayed against sideslip or lift (Fig. 2A). If the target instead moved  
152 vertically against sideslip or lift, a two-way ANOVA showed that neither the target direction  
153 nor the optic flow direction had a significant effect on the TSDN response (Fig. 2A).  
154 However, there was a significant interaction between target direction and optic flow



155 direction ( $P=0.0002$ , two-way ANOVA), consistent with the hypothesis that the interaction is  
156 inherited from the pre-synaptic neurons.

157 As above (Fig. 1, S2), the TSDN response was facilitated when a target moved horizontally  
158 against sideslip in the opposite direction, but inhibited against lift (Fig. 2B). When comparing  
159 this to vertical target motion, a two-way ANOVA showed that both the target direction and  
160 the optic flow direction significantly affected the TSDN response (Fig. 2B,  $P=0.0092$  and  
161  $P=0.0228$ , respectively). In addition, there was a significant interaction between target  
162 direction and optic flow direction ( $P=0.0010$ , two-way ANOVA, Fig. 2B), consistent with the  
163 hypothesis that the interaction is inherited from pre-synaptic neurons.

#### 164 ***Presynaptic neurons***

165 From which pre-synaptic neurons do the TSDNs inherit these interactions? TSDNs have been  
166 proposed to get their input from STMDs (25), but this has never been shown conclusively,  
167 and in addition, there are many other target tuned neurons in the fly optic lobes (e.g. 24,  
168 26-29). We can investigate this by looking at the underlying target tuning mechanisms,  
169 which can be distilled down into three fundamentally different concepts. For example,  
170 visual neurons can become target tuned by receiving inhibitory feedback from the widefield  
171 system (29-31), or by using center-surround antagonism together with rapid adaptation (28,  
172 32). Alternatively, they can use an elementary STMD model, which is tuned to the unique  
173 spatio-temporal profile of a moving target, with a dark contrast change (OFF) from the  
174 leading edge followed by a bright contrast change (ON) by the trailing edge. Importantly,  
175 while the first two mechanisms rely on comparisons from neighboring points in space, the  
176 elementary STMD compares input from one point on space (22, 28, 33). Therefore, the first

177 two models will respond equally well to the motion of a target, to the motion of a leading  
178 OFF edge, and the motion of a trailing ON edge (black, Fig. 3, redrawn from (28, 34)). In  
179 contrast, the elementary STMD model only responds strongly to the target (grey, Fig. 3,  
180 redrawn from (34)).

181 Our results show that TSDNs do not respond well to a leading OFF edge, or to a trailing ON  
182 edge (white, Fig. 3). However, a complete target, where the leading edge is rapidly followed  
183 by a trailing edge, gives a robust TSDN response (white, Fig. 3). Indeed, the physiological  
184 responses (white, Fig. 3) match the elementary STMD model output (grey, Fig. 3). Since  
185 STMD physiology also matches the elementary STMD model output (13, 34), this suggests  
186 that TSDNs receive input from STMDs.

#### 187 ***TSDN responses are inhibited by preceding optic flow***

188 In dragonflies, STMD target responses can be primed by preceding target motion, thereby  
189 facilitating responses to longer target trajectories (35, 36). To investigate if the optic flow  
190 can similarly prime TSDN responses, we displayed preceding optic flow for 1 s (green, Fig.  
191 4A), followed by optic flow concurrent (red, Fig. 4A) with target motion (blue, Fig. 4A). We  
192 found that when the sideslip moved in the same direction as the target, both the preceding  
193 and concurrent optic flow had a significant effect on the TSDN response (2-way ANOVA,  
194  $P=0.0032$  for preceding optic flow and  $P=0.0003$  for concurrent optic flow). A Bonferroni  
195 multiple comparison's test showed that the preceding optic flow had a significant effect  
196 when the optic flow was stationary concurrent with target motion (Fig. 4B), but not when it  
197 was moving (Fig. 4C).

198 In the inverse experiment, when the sideslip moved in the opposite direction to the target,  
199 only the concurrent optic flow had a significant effect on the TSDN response (2-way ANOVA,  
200  $P=0.58$  for preceding, and  $P=0.0056$  for concurrent optic flow). Thus, preceding sideslip in  
201 the opposite direction to target motion did not facilitate the TSDN response (Fig. 4D).  
202 Neither did the facilitation depend on whether the optic flow was in motion or stationary  
203 prior to target motion (Fig. 4E).

#### 204 ***Frontal optic flow is essential***

205 Our results show that yaw and sideslip optic flow have similar effects on TSDN target  
206 responses (Fig. 1). As both sideslip and yaw contain substantial motion in the frontal visual  
207 field (37), we next asked if frontal optic flow is required. We investigated this by limiting the  
208 spatial extent of sideslip to either cover the ipsilateral, dorsal, ventral or contralateral  
209 position on the screen (Fig. 5A). Note that only the dorsal position covers the TSDN  
210 receptive field (Fig. 5A). In the other three positions, the sideslip was spatially separated  
211 from the receptive field (Fig. 5A).

212 We found that when sideslip moved in the same direction as the target, the TSDN response  
213 was inhibited if the optic flow covered the full, dorsal or ventral position on the screen (Fig.  
214 5B), compared with the stationary control (grey, Fig. 5B). However, when optic flow only  
215 covered the ipsilateral or contralateral positions, there was no inhibition (Fig. 5B),  
216 suggesting that frontal optic flow is required. Our results are consistent with inhibition  
217 driven by panoramic background images, which do not have to spatially overlap the target  
218 trajectory, or have a large spatial extent (15).

219 We found that when sideslip moved in the opposite direction to the target, the TSDN  
220 response was facilitated if the optic flow covered the full, dorsal or ventral positions on the  
221 screen (Fig. 5C). When the optic flow was limited to the ipsilateral or contralateral positions,  
222 there was no facilitation (Fig. 5C). This suggests that the optic flow does not have to spatially  
223 overlap with the TSDN receptive field. However, there has to be frontal opposite direction  
224 sideslip for facilitation to take place.

## 225 **Discussion**

226 We generated optic flow using the coherent motion of thousands of “targets” within a  
227 simulated 3D space (23) and recorded from TSDNs, which respond to the motion of small  
228 targets (Fig. 1). We found that even when the “targets” in the optic flow moved in the  
229 neuron’s preferred direction, there was no response (Fig. S1D, E). However, when the optic  
230 flow was displayed together with a target, this modulated the TSDN’s target response (Fig.  
231 1, S2). In particular, optic flow in the opposite direction to target motion strongly enhanced  
232 the TSDN response, whereas optic flow in the same direction inhibited the response (Fig. 1).

233 The effect optic flow has on the TSDN response to target motion (Fig. 1, S2) could be  
234 inherited from the neurons that are pre-synaptic to the TSDNs, or alternatively, TSDNs could  
235 receive input from widefield motion sensitive neurons, as previously suggested (15).

236 However, we found e.g. that while the response to a target moving horizontally across syn-  
237 directional sideslip was strongly inhibited, if the target moved vertically against the same  
238 sideslip, the TSDN response was much larger (Fig. 2A). This argues against direct input from  
239 the widefield motion vision pathway, as we would expect the same optic flow to have the  
240 same effect on the TSDN response, irrespective of target direction. Instead, we found

241 significant interactions between target direction and optic flow direction (Fig. 2), making it  
242 likely this is inherited from the pre-synaptic neurons.

243 What are the pre-synaptic candidates? Even if TSDNs have been suggested to get input from  
244 STMDs (25), there are other optic lobe neurons tuned to the motion of targets, also referred  
245 to as objects, or figures (24, 26-29). For example, blowfly lobula plate figure detection (FD)  
246 cells receive inhibitory input from widefield motion sensitive neurons (38), thereby making  
247 them respond to the independent motion of a figure (29-31). However, FD cells are not as  
248 sharply tuned to small targets (33) as TSDNs (15), and they are inhibited by background  
249 motion in the same and in the opposite direction (29), unlike our findings (Fig. 1C, D),  
250 making it unlikely that they provide the TSDN input.

251 Another option are the anatomically defined *Drosophila* lobula columnar (LC) neurons (39).  
252 Whereas some LC neurons respond better to bars or widefield motion, LC11 and LC26  
253 neurons respond strongly to small targets (24, 40). Besides being sharply size-tuned, LC11  
254 neurons are clearly involved in behavioral responses to small objects (27, 28). LC11 small  
255 object selectivity can be explained using a combination of center-surround antagonism and  
256 rapid adaptation (28), making them inhibited by background motion in either direction (26),  
257 inconsistent with our TSDN facilitation (Fig. 1C, D). Potentially, facilitation could be achieved  
258 by making the influence of the surround directional (32). However, as the optic flow did not  
259 have to cover the TSDN receptive field to have an effect (“ventral”, Fig. 5), such center-  
260 surround mechanisms are unlikely.

261 Importantly, as both FD cells and LC11 neurons rely on an input from at least two points in  
262 space (28, 33), they respond to high-contrast changes associated with sweeping edges (28,

263 34), as well as to complete targets (black, Fig. 3). In contrast, TSDNs respond much better to  
264 a complete target, than to either OFF or ON contrast changes (white, Fig. 5), i.e. consistent  
265 with input from elementary STMDs (22). Since the elementary STMD model provides robust  
266 predictions of physiological STMD responses in dragonflies (13, 34), we conclude that it is  
267 likely that TSDNs get their input from STMDs.

268 At a first glance, this seems counterintuitive, as some STMDs respond robustly to targets in  
269 background motion, even without relative motion cues (12), whereas we saw inhibition to  
270 targets displayed against syn-directional optic flow (Fig. 1C, D). In addition, the elementary  
271 STMD model predicts that target-like features in the background should generate a  
272 response (22). In our TSDN experiments, despite the optic flow consisting of “targets” with  
273 optimal spatio-temporal profiles (Movie 5, 6), there were no consistent responses to  
274 preferred direction optic flow (e.g. “Sideslip +50”, “Yaw +50”, Fig. S1D, E, see also raw data,  
275 Fig. 4A).

276 However, STMDs are a heterogeneous group (12), and in some STMDs responses to target  
277 motion are decreased by syn-directional background motion (18). Indeed, the centrifugal  
278 STMDs that respond most robustly to targets against background motion (12, 13), and that  
279 respond to background features with target-like profiles (13), do not project to pre-motor  
280 areas, but contralaterally through the protocerebrum, with outputs in the heterolateral  
281 lobula (12, 41). This suggests a role in modulating the responses of other optic lobe neurons,  
282 rather than providing direct input to descending neurons (14). In contrast, the STMDs that  
283 have small receptive fields, and outputs in pre-motor areas of the lateral mid-brain, and that  
284 are therefore more likely to be pre-synaptic to the TSDNs, are often inhibited by background  
285 motion (18).

286 Our data suggest that inhibition and facilitation are not necessarily generated by the same  
287 mechanism. For example, most types of optic flow generated inhibition (Fig. S2), but only  
288 opposite direction yaw and sideslip led to facilitation (Fig. 1C, D). In addition, unlike  
289 facilitation, inhibition could be primed (Fig. 4). Importantly, the facilitation of TSDN  
290 responses to target motion displayed on optic flow in the opposite direction (Fig. 1C, D) is a  
291 novel observation. In previous work using panoramic background images, TSDN responses  
292 were significantly reduced when the background moved in the opposite direction to the  
293 target (15). This suggests that facilitation is not generated by a widefield motion sensitive  
294 neuron, as such a neuron would respond to panoramic background images (15) as well as to  
295 optic flow (23).

296 The elementary STMD model predicts a response to the “targets” in the optic flow (22), as  
297 these have correct spatio-temporal profiles. While the TSDN response matches the  
298 elementary STMD model (Fig. 3), TSDNs do not respond to optic flow when displayed alone  
299 (Fig. S1D, E), therefore suggesting pre-synaptic inhibition from the widefield motion  
300 pathway (Fig. 2). However, STMDs with input from elementary STMDs, but without  
301 inhibition from widefield motion, should respond to the “targets” in optic flow, as  
302 evidenced by dragonfly centrifugal STMDs (13). In contrast, background images lacking high-  
303 contrast features do not generate a response in centrifugal STMDs (12, 13). Therefore, such  
304 STMDs may drive the TSDN facilitation. Given facilitation requires frontal, horizontal motion  
305 (Fig. 5), these neurons would likely have frontal receptive fields. The centrifugal STMDs have  
306 large receptive fields (12, 41), suggesting that ipsilateral or contralateral optic flow should  
307 also drive facilitation, which it did not (Fig. 5). Importantly, however, there are at least 20

308 different STMD types in the hoverfly lobula (12), suggesting that future investigation of  
309 STMD responses to targets in clutter are required to identify the neurons driving facilitation.  
310 Nevertheless, the facilitation could make behavioral sense. Prior to initiating target pursuit,  
311 male *Eristalis* hoverflies have been described to predict the flight course required to  
312 successfully intercept the target, based predominantly on the target's angular velocity (42).  
313 To successfully execute an interception style flight course, the hoverfly turns in the direction  
314 that the target is moving (42). In doing so, the hoverfly creates self-generated optic flow in  
315 the opposite direction to the target's motion. If the TSDNs that we have recorded from here  
316 are involved in such planning of pursuit, they would be facilitated when the target moves in  
317 the opposite direction to the self-generated optic flow (Fig. 1C, D), which might be beneficial  
318 for controlling behavioral output. Reconstructing retinal flow fields as experienced during  
319 actual pursuits (19) could help address this question.

## 320 **Materials and Methods**

### 321 ***Electrophysiology***

322 *Eristalis tenax* hoverflies were reared and maintained as previously described (43). For  
323 electrophysiology, a male hoverfly was immobilized ventral side up using a beeswax and  
324 resin mixture. A small hole was cut at the anterior end of the thorax to expose the cervical  
325 connective, which was then raised slightly and supported using a small wire hook, for  
326 insertion of a sharp polyimide-insulated tungsten microelectrode (2 MOhm, Microprobes,  
327 Gaithersburg, USA). The animal was grounded via a silver wire inserted into the ventral part  
328 of the hole.



329 Extracellular signals were amplified at 100x gain and filtered through a 10- to 3000-Hz  
330 bandwidth filter on a DAM50 differential amplifier (World Precision Instruments, Sarasota,  
331 USA), with 50 Hz noise removed with a HumBug (Quest Scientific, North Vancouver,  
332 Canada). The data were digitized via Powerlab 4/30 (ADInstruments, Sydney, Australia) and  
333 acquired at 40 kHz with LabChart 7 Pro software (ADInstruments). Single units were  
334 discriminated by amplitude and half-width using Spike Histogram software (ADInstruments).

### 335 ***Visual stimuli***

336 *Eristalis* males were placed ventral side up, centered and perpendicular to an Asus LCD  
337 screen (Asus, Taipei, Taiwan) at 6.5 cm distance. The screen had a refresh rate of 165 Hz, a  
338 linearized contrast with a mean illuminance of 200 Lux, and a spatial resolution of 2560 x  
339 1440 pixels, giving a projected screen size of 155° x 138°. Visual stimuli were displayed using  
340 custom written software based on the Psychophysics toolbox (44, 45) in Matlab  
341 (Mathworks, Natick, USA).

342 TSDNs were identified as described (15, 23). In short, we mapped the receptive field of each  
343 neuron by scanning a target horizontally and vertically at 20 evenly spaced elevations and  
344 azimuths (23), to calculate the local motion sensitivity and local preferred direction. We  
345 then scanned targets of varying height through the small, dorso-frontal receptive fields (Fig.  
346 4A) to confirm that each neuron was sharply size tuned with a peak response to targets  
347 subtending 3°- 6°, with no response to larger bars, to looming or to widefield stimuli (15,  
348 23).

349 Unless otherwise mentioned, targets were black and round with a diameter of 15 pixels,  
350 moving at a velocity of 900 pixels/s for 0.48 s. When converted to angular values and taking

351 the small frontal receptive fields of TSDNs into account, this corresponds to an average  
352 diameter of  $3^\circ$  and a velocity of  $130^\circ/\text{s}$  (15). Unless otherwise stated, each target travelled in  
353 each neuron's preferred horizontal direction (i.e. left or right) and across the center of its  
354 receptive field. Between repetitions, we varied the target elevation slightly, to minimize  
355 habituation (15). There was a minimum 4 s between stimulus presentations. Stimulus order  
356 was randomized.

357 For input mechanism experiment (Fig. 3), targets were black and square with a side of 15  
358 pixels, moving at a velocity of 900 pixels/s. OFF and ON edges had a height of 15 pixels. All  
359 stimuli started at the far edge of the screen moving in each neuron's preferred direction,  
360 across the entire width of the screen.

361 3D optic flow was generated as previously described (23). Briefly, the optic flow consisted of  
362 a simulated cube with 4 m sides, filled with 2 cm diameter spheres at a density of  
363 100 per  $\text{m}^3$ , with the hoverfly placed in the center. The coherent motion of these ca 6400  
364 spheres around the hoverfly was used to simulate self-generated optic flow. The ca 1200  
365 spheres anterior to the hoverfly were projected onto the screen, with their size indicating  
366 the distance from the hoverfly. Circles closer than 6 cm were not displayed. Six types of  
367 optic flow were simulated: three translations at 50 cm/s (sideslip, lift and thrust) and three  
368 rotations at  $50^\circ/\text{s}$  (yaw, pitch and roll). Unless otherwise stated optic flow was displayed for  
369 0.48 s prior to the target. Both target motion and optic flow disappeared simultaneously.

370 In most experiments the optic flow covered the entire visual display. In some experiments,  
371 we limited the spatial extent of the optic flow, into 4 spatial positions (Fig. 5A). TSDN  
372 receptive fields tend to be located slightly offset from the visual midline, with preferred

373 direction of motion away from the midline (Fig. 5A). We defined the lateral parts of the  
374 display as either ipsilateral or contralateral based on the preferred direction of each TSDN.

### 375 ***Data analysis and statistics***

376 We recorded from 34 TSDNs in 34 male hoverflies. We kept data from all TSDNs that  
377 showed a robust response to a target moving over a white background (Fig. 1B, Movie 1, 2).  
378 We repeated this control throughout the recording, and only kept data from neurons that  
379 responded consistently. We only kept data from experiments with a minimum 9 repetitions.  
380 The data from repetitions within a neuron were averaged, and shown as spike histograms  
381 (mean  $\pm$  sem) with 1 ms resolution, after smoothing with a 20 ms square-wave filter. For  
382 quantification across neurons in most cases, we calculated the mean spike rate for each  
383 neuron from the spike histogram for the duration of target motion, after excluding the first  
384 and last 40 ms (dotted boxes, Fig. S1B-E). We normalized the responses to each neuron's  
385 own mean response to a target moving over a white background.

386 For the model experiment (Fig. 3), we calculated the mean spike rate across 0.48 s from the  
387 spike histogram when the target traversed each neuron's receptive field. We normalized  
388 the data from each neuron to the sum of the responses to the three stimuli (ON, OFF,  
389 target).

390 Data analysis was performed in Matlab and statistical analysis in Prism 7.0c for Mac OS X  
391 (GraphPad Software, San Diego, USA). Throughout the paper  $n$  refers to the number of  
392 repetitions within one neuron, and  $N$  to the number of neurons. The sample size, type of  
393 test and P value is indicated in each figure legend. We performed paired t-tests, one-way  
394 ANOVAs, followed by Dunnett's post hoc test for multiple comparisons, or two-way RM

395 ANOVAs, followed by Bonferroni's post hoc test for multiple comparisons. All data have  
396 been deposited to DataDryad.

### 397 **Acknowledgements**

398 We thank lab members for constructive feedback, and the Botanic Gardens of Adelaide for  
399 their ongoing support. This research was funded by the US Air Force Office of Scientific  
400 Research (AFOSR, FA9550-19-1-0294), the Australian Research Council (ARC, DP170100008,  
401 DP180100144 and FT180100289), and the Flinders Foundation.

402

## 403   **References**

- 404   1.     P. T. Gonzalez-Bellido, S. T. Fabian, K. Nordström, Target detection in insects: optical,  
405         neural and behavioral optimizations. *Curr Opin Neurobiol* **41**, 122-128 (2016).
- 406   2.     W. Wellington, S. Fitzpatrick, Territoriality in the drone fly, *Eristalis tenax* (Diptera,  
407         Syrphidae). *Can Entomol* **113**, 695-704 (1981).
- 408   3.     J. Zeil, Sexual dimorphism in the visual system of flies: The free flight behavior of  
409         male Bibionidae (Diptera). *J Comp Physiol A* **150**, 395-412 (1983).
- 410   4.     S. T. Fabian, M. E. Sumner, T. J. Wardill, S. Rossoni, P. T. Gonzalez-Bellido,  
411         Interception by two predatory fly species is explained by a proportional navigation  
412         feedback controller. *Journal of The Royal Society Interface* **15** (2018).
- 413   5.     R. Schröder, C. N. Linkem, J. A. Rivera, M. A. Butler, Should I stay or should I go?  
414         Perching damselfly use simple colour and size cues to trigger flight. *Animal Behaviour*  
415         **145**, 29-37 (2018).
- 416   6.     C. T. O'Rourke, T. Pitlik, M. Hoover, E. Fernández-Juricic, Hawk eyes II: diurnal raptors  
417         differ in head movement strategies when scanning from perches. *PLoS One* **5**,  
418         e12169 (2010).
- 419   7.     S. M. Fitzpatrick, W. G. Wellington, Contrasts in the territorial behavior of three  
420         species of hover flies (Diptera: Syrphidae). *Can Entomol* **115**, 559-566 (1983).
- 421   8.     E. L. Corvidae, R. O. Bierregaard, S. E. Peters, Comparison of wing morphology in  
422         three birds of prey: correlations with differences in flight behavior. *J Morphol* **267**,  
423         612-622 (2006).
- 424   9.     J. J. Koenderink, Optic flow. *Vision Res* **26**, 161-179 (1986).
- 425   10.    M. F. Land, Visual acuity in insects. *Annu Rev Entomol* **42**, 147-177 (1997).

- 426 11. D. O'Carroll, Feature-detecting neurons in dragonflies. *Nature* **362**, 541-543 (1993).
- 427 12. K. Nordström, P. D. Barnett, D. C. O'Carroll, Insect detection of small targets moving  
428 in visual clutter. *PLoS Biol* **4**, 378-386 (2006).
- 429 13. S. D. Wiederman, D. C. O'Carroll, Discrimination of features in natural scenes by a  
430 dragonfly neuron. *J Neurosci* **31**, 7141-7144 (2011).
- 431 14. K. Nordström, Neural specializations for small target detection in insects. *Curr Opin*  
432 *Neurobiol* **22**, 272-278 (2012).
- 433 15. S. Nicholas, J. Supple, R. Leibbrandt, P. T. Gonzalez-Bellido, K. Nordström, Integration  
434 of small- and wide-field visual features in Target-Selective Descending Neurons of  
435 both predatory and non-predatory dipterans. *J Neurosci* **38**, 10725-10733 (2018).
- 436 16. S. Namiki, M. H. Dickinson, A. M. Wong, W. Korff, G. M. Card, The functional  
437 organization of descending sensory-motor pathways in *Drosophila*. *eLife* **7**, e34272  
438 (2018).
- 439 17. C. L. Chen *et al.*, Imaging neural activity in the ventral nerve cord of behaving adult  
440 *Drosophila*. *Nat Commun* **9**, 4390 (2018).
- 441 18. P. D. Barnett, K. Nordström, D. C. O'Carroll, Retinotopic organization of small-field-  
442 target-detecting neurons in the insect visual system. *Curr Biol* **17**, 569-578 (2007).
- 443 19. T. Wardill *et al.*, A novel interception strategy in a miniature robber fly with extreme  
444 visual acuity. *Curr Biol* **27**, 854-859 (2017).
- 445 20. R. M. Olberg, A. H. Worthington, J. L. Fox, C. E. Bessette, M. P. Loosemore, Prey size  
446 selection and distance estimation in foraging adult dragonflies. *J Comp Physiol A* **191**,  
447 791-797 (2005).

- 448 21. O. Dyakova, Y.-J. Lee, K. D. Longden, V. G. Kiselev, K. Nordström, A higher order  
449 visual neuron tuned to the spatial amplitude spectra of natural scenes. *Nat Commun*  
450 **6**, 8522 (2015).
- 451 22. S. D. Wiederman, P. A. Shoemaker, D. C. O'Carroll, A model for the detection of  
452 moving targets in visual clutter inspired by insect physiology. *PLoS ONE* **3**, e2784  
453 (2008).
- 454 23. S. Nicholas, R. Leibbrandt, K. Nordström, Visual motion sensitivity in descending  
455 neurons in the hoverfly. *J Comp Physiol A* **206**, 149-163 (2020).
- 456 24. C. Städele, M. F. Keleş, J. M. Mongeau, M. A. Frye, Non-canonical receptive field  
457 properties and neuromodulation of Feature-Detecting neurons in flies. *Curr Biol*  
458 10.1016/j.cub.2020.04.069 (2020).
- 459 25. K. Nordström, D. C. O'Carroll, Feature detection and the hypercomplex property in  
460 insects. *Trends Neurosci* **32**, 383-391 (2009).
- 461 26. M. F. Keleş, B. J. Hardcastle, C. Städele, Q. Xiao, M. A. Frye, Inhibitory interactions  
462 and columnar inputs to an object motion detector in *Drosophila*. *Cell Rep* **30**, 2115-  
463 2124.e2115 (2020).
- 464 27. M. F. Keleş, M. A. Frye, Object-detecting neurons in *Drosophila*. *Curr Biol* **27**, 680-687  
465 (2017).
- 466 28. R. Tanaka, D. A. Clark, Object-displacement-sensitive visual neurons drive freezing in  
467 *Drosophila*. *Curr Biol* 10.1016/j.cub.2020.04.068 (2020).
- 468 29. M. Egelhaaf, On the neuronal basis of figure-ground discrimination by relative  
469 motion in the visual system of the fly. II. Figure-detection cells, a new class of visual  
470 interneurons. *Biol Cybern* **52**, 195-209 (1985).

- 471 30. A. K. Warzecha, M. Egelhaaf, A. Borst, Neural circuit tuning fly visual interneurons to  
472 motion of small objects. I. Dissection of the circuit by pharmacological and  
473 photoinactivation techniques. *J Neurophysiol* **69**, 329-339 (1993).
- 474 31. W. Reichardt, T. Poggio, Figure-ground discrimination by relative movement in the  
475 visual-system of the fly. Part I: Experimental results. *Biol Cybern* **35**, 81-100 (1979).
- 476 32. T. Collett, Visual neurones in the anterior optic tract of the privet hawk moth. *J Comp*  
477 *Physiol* **78**, 396-433 (1972).
- 478 33. M. Egelhaaf, On the neuronal basis of figure-ground discrimination by relative  
479 motion in the visual system of the fly. III. Possible input circuitries and behavioral  
480 significance of the FD-cells. *Biol Cybern* **52**, 267-280 (1985).
- 481 34. S. D. Wiederman, P. A. Shoemaker, D. C. O'Carroll, Correlation between OFF and ON  
482 Channels Underlies Dark Target Selectivity in an Insect Visual System. *J Neurosci* **33**,  
483 13225-13232 (2013).
- 484 35. S. D. Wiederman, J. M. Fabian, J. R. Dunbier, D. C. O'Carroll, A predictive focus of gain  
485 modulation encodes target trajectories in insect vision. *eLife* **6** (2017).
- 486 36. K. Nordström, D. M. Bolzon, D. C. O'Carroll, Spatial facilitation by a high-performance  
487 dragonfly target-detecting neuron. *Biol Lett* **7**, 588-592 (2011).
- 488 37. M. O. Franz, H. G. Krapp, Wide-field, motion-sensitive neurons and matched filters  
489 for optic flow fields. *Biol Cybern* **83**, 185-197 (2000).
- 490 38. A. K. Warzecha, A. Borst, M. Egelhaaf, Photo-ablation of single neurons in the fly  
491 visual system reveals neural circuit for the detection of small moving objects.  
492 *Neurosci Lett* **141**, 119-122 (1992).



- 493 39. J. W. Aptekar, M. F. Keles, P. M. Lu, N. M. Zolotova, M. A. Frye, Neurons forming  
494 optic glomeruli compute figure-ground discriminations in *Drosophila*. *J Neurosci* **35**,  
495 7587-7599 (2015).
- 496 40. M. Wu *et al.*, Visual projection neurons in the *Drosophila* lobula link feature  
497 detection to distinct behavioral programs. *eLife* **5**, e21022 (2016).
- 498 41. B. R. H. Geurten, K. Nordström, J. D. H. Sprayberry, D. M. Bolzon, D. C. O'Carroll,  
499 Neural mechanisms underlying target detection in a dragonfly centrifugal neuron. *J*  
500 *Exp Biol* **210**, 3277-3284 (2007).
- 501 42. T. S. Collett, M. F. Land, How hoverflies compute interception courses. *J Comp*  
502 *Physiol A* **125**, 191-204 (1978).
- 503 43. S. Nicholas, M. Thyselius, M. Holden, K. Nordström, Rearing and long-term  
504 maintenance of *Eristalis tenax* hoverflies for research studies. *JoVE*  
505 doi:10.3791/57711, e57711 (2018).
- 506 44. D. H. Brainard, The Psychophysics toolbox. *Spatial Vision* **10**, 433-436 (1997).
- 507 45. D. G. Pelli, The VideoToolbox software for visual psychophysics: Transforming  
508 numbers into movies. *Spatial Vision* **10**, 437-442 (1997).

509

510

## 511 **Figure Legends**

### 512 ***Figure 1. The TSDN response to target motion is affected by horizontal optic flow***

513 **A)** Pictograms of the round, black target, with a diameter of 3°, traversing a white  
514 background (left), or stationary optic flow (right), at 130°/s. **B)** The mean spiking response of  
515 different TSDNs was significantly reduced when the target moved across stationary optic  
516 flow compared with a white background (N=34; \*\*\*P < 0.001, two-tailed paired t-test). **C)**  
517 The TSDN response to a target traversing stationary optic flow (left, grey), sideslip or yaw in  
518 either the same or the opposite direction to the target (red pictograms). All histograms from  
519 a single TSDN (mean ± sem, n=18) shown with 1 ms resolution after smoothing with a 20 ms  
520 square-wave filter. **D)** The mean response across TSDNs (N=12) to a target traversing  
521 stationary optic flow (left, grey), sideslip or yaw, in the same direction (“+50”) or opposite  
522 direction (“-50”) to the target, after normalizing the data to each neuron’s own response to  
523 a target traversing a white background. Sideslip was simulated at 50 cm/s and yaw at 50°/s.  
524 The line shows the mean and the filled data points correspond to the neuron in panel C. In  
525 panel D significance is shown with \*\*\*\* for P < 0.0001 following a one-way ANOVA followed  
526 by Dunnett’s multiple comparison’s test done together with the data shown in Fig. S2B.

### 527 ***Figure 2. Interactions between optic flow and target direction***

528 **A)** The data show TSDN responses to targets moving either horizontally or vertically across  
529 sideslip or lift, in the same direction as the target, or perpendicular to the target, as  
530 indicated by the pictograms. N=8. Two-way ANOVA showed P=0.2959 for target direction,  
531 P=0.7639 for optic flow direction and P=0.0002 for the interaction between target and optic  
532 flow. **B)** TSDN responses to targets moving horizontally or vertically across sideslip or lift, in

533 the opposite direction to the target, or perpendicular to the target, as indicated by the  
534 pictograms. Two-way ANOVA showed  $P=0.0092$  for target direction,  $P=0.0228$  for optic flow  
535 direction and  $P=0.0010$  for the interaction between target and optic flow. Same  $N=8$  in  
536 panels A and B.

537 **Figure 3. Elementary STMD input to TSDNs**

538 Responses to a leading OFF edge, trailing ON edge, or a complete black target, with a side of  
539  $3^\circ$ , traversing a white background at  $130^\circ/\text{s}$ . The black data show the predicted output from  
540 a motion detector that compares luminance changes from at least 2 points in space. Data  
541 replotted from (34), after normalizing to its own sum. The grey data show the predicted  
542 output from an elementary STMD (ESTMD), which compares luminance changes from one  
543 point in space. Data replotted from (34), after normalizing to its own sum. The white data  
544 show the TSDN response to the same three stimuli ( $N=6$ ) after normalizing the data from  
545 each neuron to its own sum.

546 **Figure 4. The TSDN inhibition by syn-directional sideslip can be primed**

547 **A)** Raw data trace from one TSDN to a target moving across sideslip moving in the same  
548 direction as the target preceding target motion, then being stationary concurrent with  
549 target motion. Timing is color coded: green, preceding optic flow; red, concurrent optic  
550 flow; blue, target motion. **B)** TSDN target responses are significantly inhibited by preceding  
551 sideslip in the same direction as the target, compared with preceding stationary optic flow.  
552 **C)** There was no significant difference between TSDN responses to targets moving across  
553 syn-directional sideslip, when the sideslip moved preceding target motion compared with  
554 preceding stationary optic flow (two-way ANOVA for the data in panels B and C, followed by

555 Post hoc Bonferroni's test: \*\*\* $P=0.0004$ . **D)** There was no significant difference between  
556 TSDN responses to targets moving across stationary optic flow, whether this moved in the  
557 opposite direction or not preceding target motion. The grey data is the same as in panel B.  
558 **E)** There was no significant difference between TSDN responses to targets on sideslip in the  
559 opposite direction to target motion, whether the optic flow moved or not preceding target  
560 motion (two-way ANOVA for data in panels D and E, ns). Data from the same  $N=7$  in panels  
561 B-E, with the lines showing the mean.

562 ***Figure 5. Frontal optic flow is essential***

563 **A)** A pictogram of the separation of the optic flow into four distinct positions: ipsilateral (IL),  
564 dorsal (D), ventral (V) and contralateral (CL). The color coding shows the receptive field of  
565 an example TSDN, and the arrows the local motion sensitivity. **B)** TSDN responses to targets  
566 moving across syn-directional sideslip are significantly inhibited compared to stationary  
567 control (grey) if the sideslip covers the full, dorsal or ventral screen. **C)** TSDN responses to  
568 targets moving across opposite direction sideslip are significantly facilitated compared to  
569 stationary control (grey, same data as in panel B) if the sideslip covers the full, dorsal or  
570 ventral visual field. Panels B and C show data from the same neurons ( $N=10$ , one-way  
571 ANOVA followed by Dunnett's multiple comparisons test, with  $*P<0.05$ ,  $**P<0.01$ ).

572

## 573 **Supplementary Information**

### 574 ***Figure S1. The TSDN response to target motion and optic flow***

575 **A)** Raw data trace from an extracellular TSDN recording. Timing of stimulus presentation  
576 indicated by colored bars (blue, target, and red, optic flow). **B)** Magnification of the raw data  
577 traces shown in panel A. **C)** Spike raster of the same neuron in response to 18 repeated  
578 trials of a target on a white background (left) or on stationary optic flow (right). **D)** To  
579 determine the TSDN response to the optic flow we first quantified each neuron's  
580 spontaneous rate, i.e. the spikes generated when viewing a white background, and used this  
581 as a threshold. For each neuron we then quantified the number of trials in which the  
582 response to the optic flow was above this threshold. This was converted to a percentage of  
583 responses. The data here show this percentage of responses across 12 TSDNs as mean  $\pm$   
584 sem. **E)** In each neuron, we quantified the mean response for those trials that were  
585 classified as responders (in panel D). This mean response was normalized to each neuron's  
586 mean response to a target traversing a white background, as throughout the rest of the  
587 paper. Data are shown as mean  $\pm$  sem (N=12).

### 588 ***Figure S2. The TSDN response to target motion is affected by 3D optic flow***

589 **A)** The response from one TSDN to a target traversing stationary optic flow (left, grey,  
590 replotted from Fig. 1C), or different types of optic flow (see red pictograms). All histograms  
591 shown as mean  $\pm$  sem (n=18) at 1 ms resolution, after smoothing with a 20 ms square-wave  
592 filter. **B)** The mean response across TSDNs (N=12, same neurons as Fig. 1D) to a target  
593 traversing stationary optic flow (left, grey, replotted from Fig. 1D), or different types of optic  
594 flow. Stars indicate significance, one-way ANOVA followed by Dunnett's multiple

595 comparisons test (\*\* $P < 0.01$ , \*\*\* $P < 0.001$  and \*\*\*\* $P < 0.0001$ ). Note that the one-way ANOVA  
596 was done together with the data shown in Fig. 1D. Translations were simulated at 50 cm/s  
597 and rotations at 50°/s. The lines show the mean and the filled data points correspond to the  
598 neuron in panel A.

599 ***Figure S3. The TSDN response to vertical target motion***

600 **A)** The TSDN response to a target traversing a white background horizontally (left, grey) or  
601 vertically (right, black). Histograms shown as mean  $\pm$  sem (n=18) at 1 ms resolution, after  
602 smoothing with a 20 ms square-wave filter. **B)** The mean spiking response of 8 TSDNs to  
603 targets moving horizontally (grey, left) or vertically (black, right) over a white background.

604 ***Movie 1. TSDN response to a target over a white background***

605 The movie depicts the stimulus as displayed on the screen, with the hoverfly positioned  
606 centered and perpendicular to the screen. The hoverfly was positioned ventral side up, but  
607 we have rotated the movie for display purposes so the dorsal side is up. The colored lines  
608 show the outline of the receptive field, mapped as described previously (23). The red data at  
609 the bottom of the movie show the response of an example TSDN.

610 ***Movie 2. TSDN response to a target over a white background***

611 Same as Movie 1, but slowed down 10 times.

612 ***Movie 3. TSDN response to a target over stationary optic flow***

613 The movie depicts the stimulus as displayed on the screen, with the colored lines showing  
614 the outline of the receptive field. The red data at the bottom of the movie show the

615 response of an example TSDN. In this case the optic flow was stationary, and appeared 0.5 s  
616 before the target.

617 ***Movie 4. TSDN response to a target over stationary optic flow***

618 Same as Movie 3, but slowed down 10 times.

619 ***Movie 5. TSDN response to a target over syn-directional sideslip optic flow***

620 The movie depicts the response of the same example TSDN to the same target motion as in

621 previous movies, but now traversing sideslip optic flow appearing 0.5 s before the target.

622 The hoverfly was positioned at a distance of 6.5 cm. At this viewing distance, the resulting

623 optic flow simulates the type of optic flow that would be generated by the hoverfly side-

624 slipping through the world at 50 cm/s. The simulated optic flow consisted of ca 6400

625 spheres, of which roughly 1200 are projected onto the screen at any one time.

626 ***Movie 6. TSDN response to a target over syn-directional sideslip optic flow***

627 Same as Movie 5, but slowed down 10 times. Note that many of the optic flow “targets” of

628 the correct size move through the receptive field (colored contour lines).

629 ***Movie 7. TSDN response to a target over opposite direction sideslip optic flow***

630 The movie depicts the response of the same example TSDN to the same target motion as in

631 previous movies, but now traversing sideslip optic flow in the opposite direction to the

632 target.

633

634 ***Movie 8. TSDN response to a target over opposite direction sideslip optic flow***

635 Same as Movie 7, but slowed down 10 times.

636



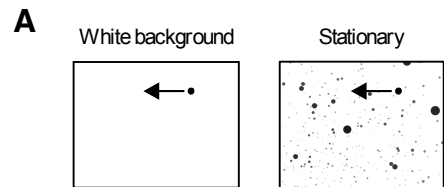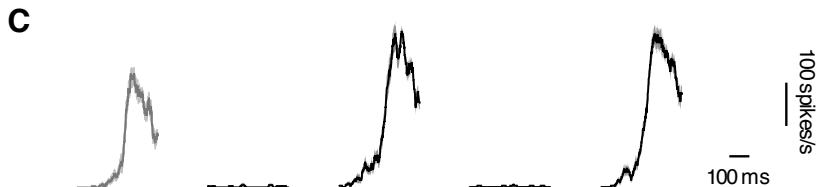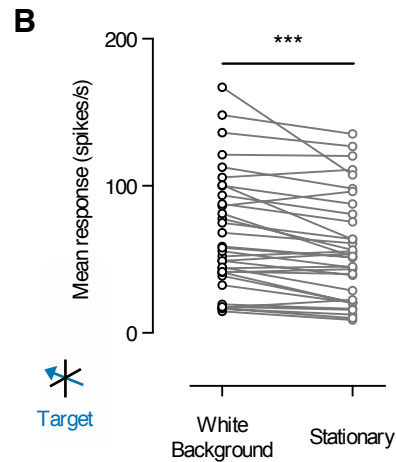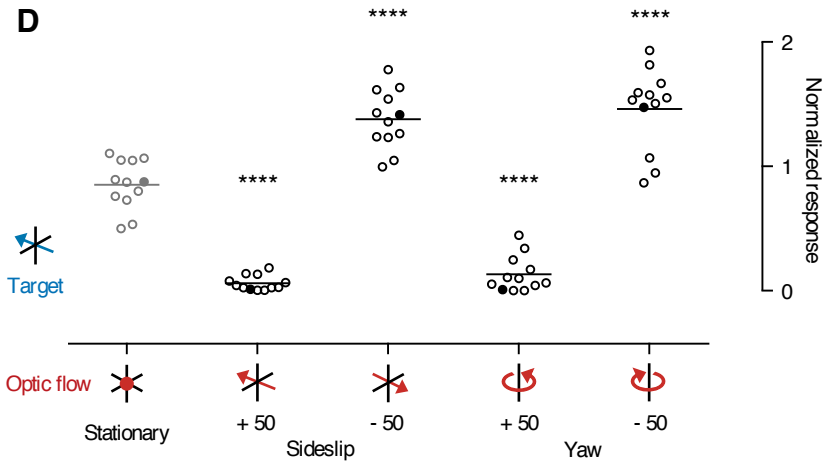

**A**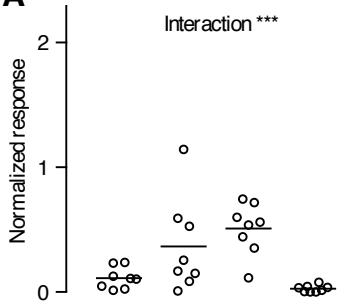**B**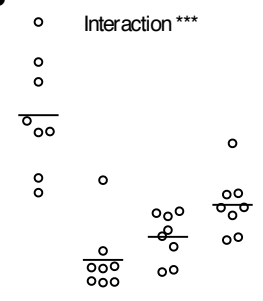

Target

Optic flow

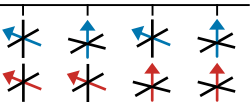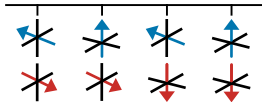

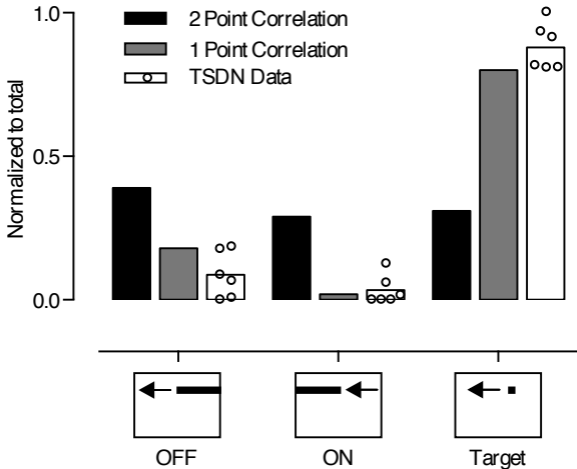

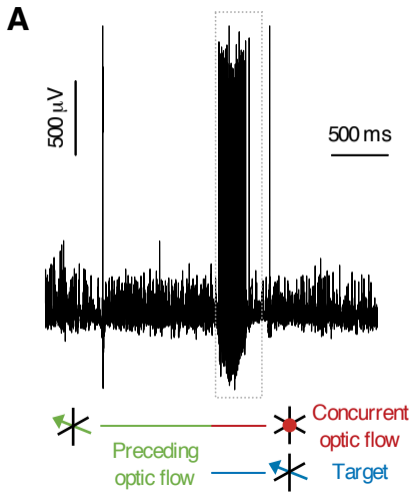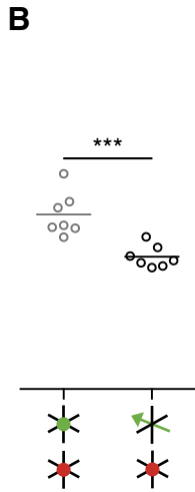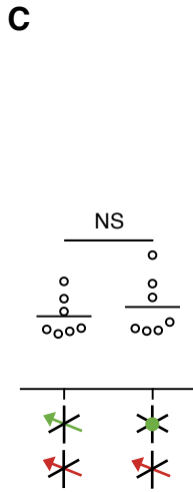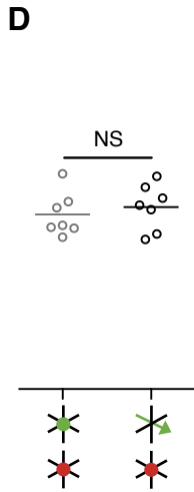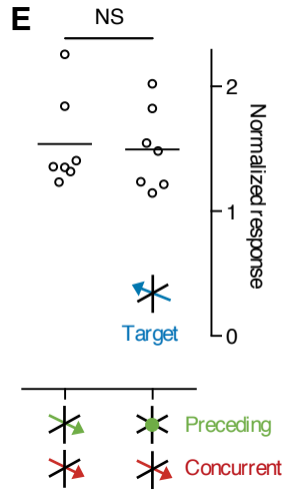

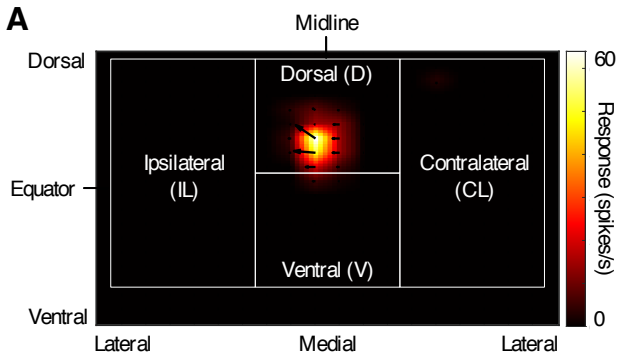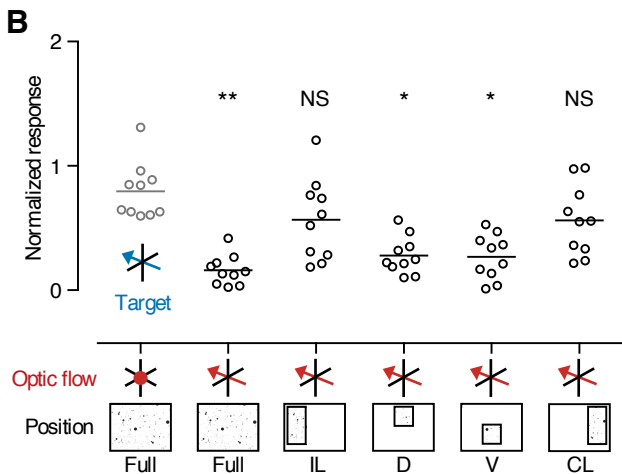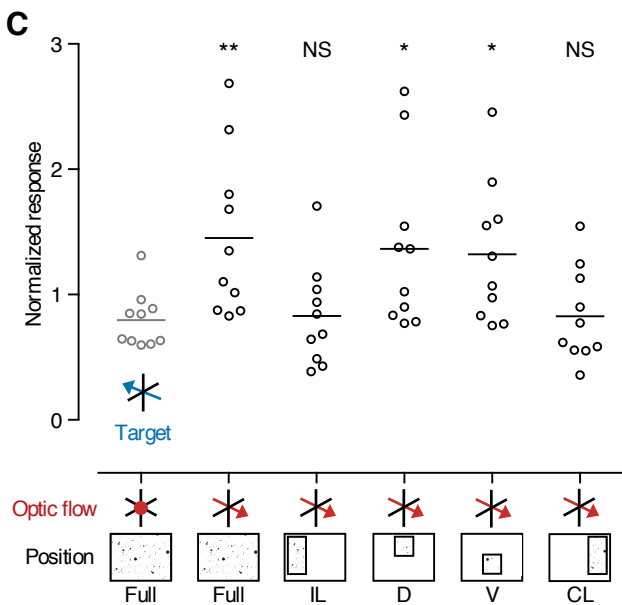

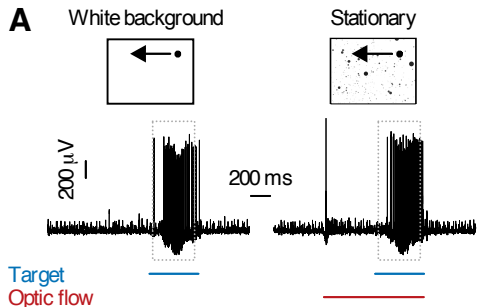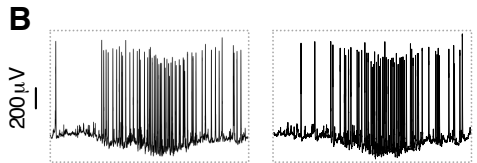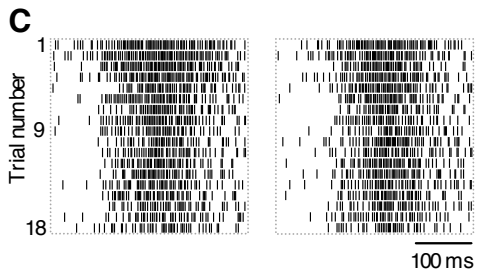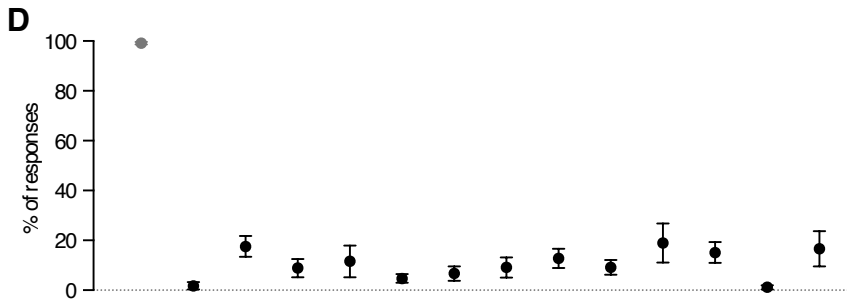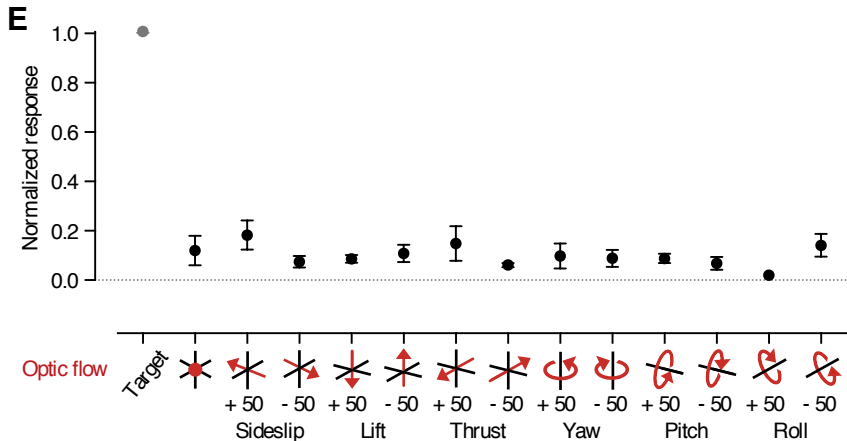

**A**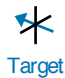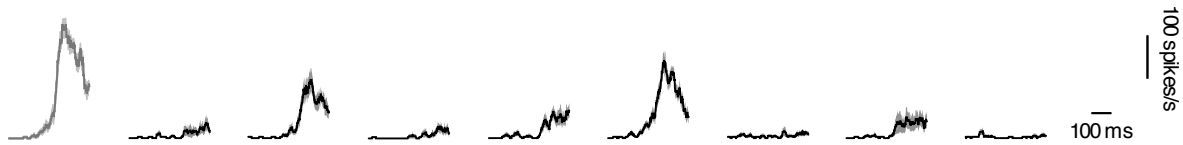**B**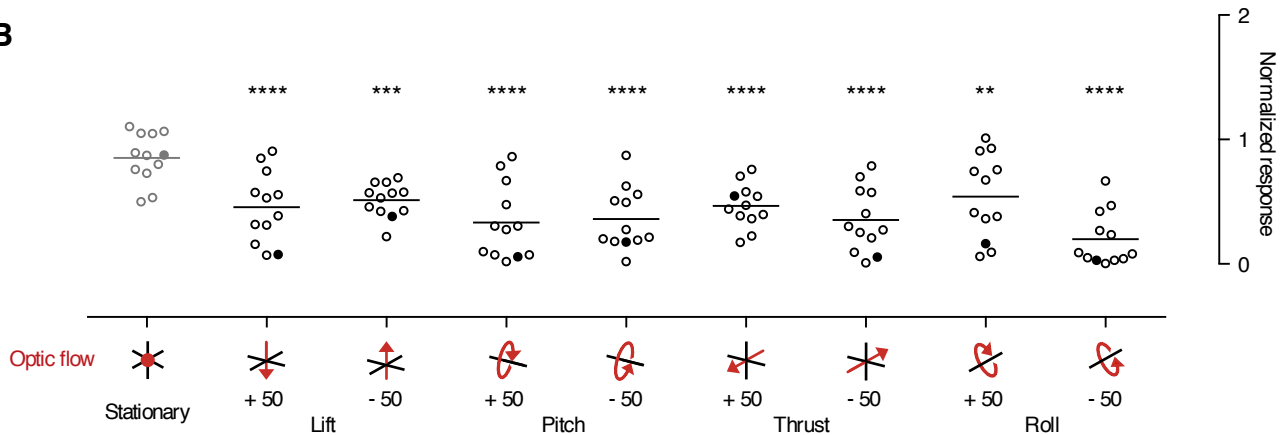

**A**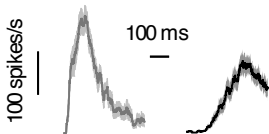**B**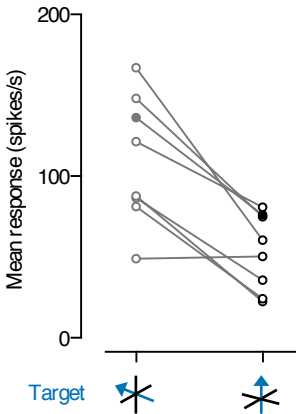

Source: https://www.biorxiv.org/content/10.1101/2020.06.28.172536v2.full.pdf
